# Supplementary material for: Coal based activated carbon nanofibers prepared by electrospinning
Source: Royal Society of Chemistry journal article supplement (doi:10.1039/c4ta00069b), 2014-01-01
Supplement: c4ta00069b1.pdf [file c4ta00069b1.pdf]

## **Supporting Information:**

### **Coal based activated carbon nanofibers prepared by electrospinning**

**Hongyang Zhao<sup>a</sup>, Luxiang Wang<sup>a</sup>, Dianzeng Jia<sup>\*a</sup>, Wei Xia<sup>b</sup>, Jun Li<sup>a</sup>, Zaiping Guo<sup>c</sup>**

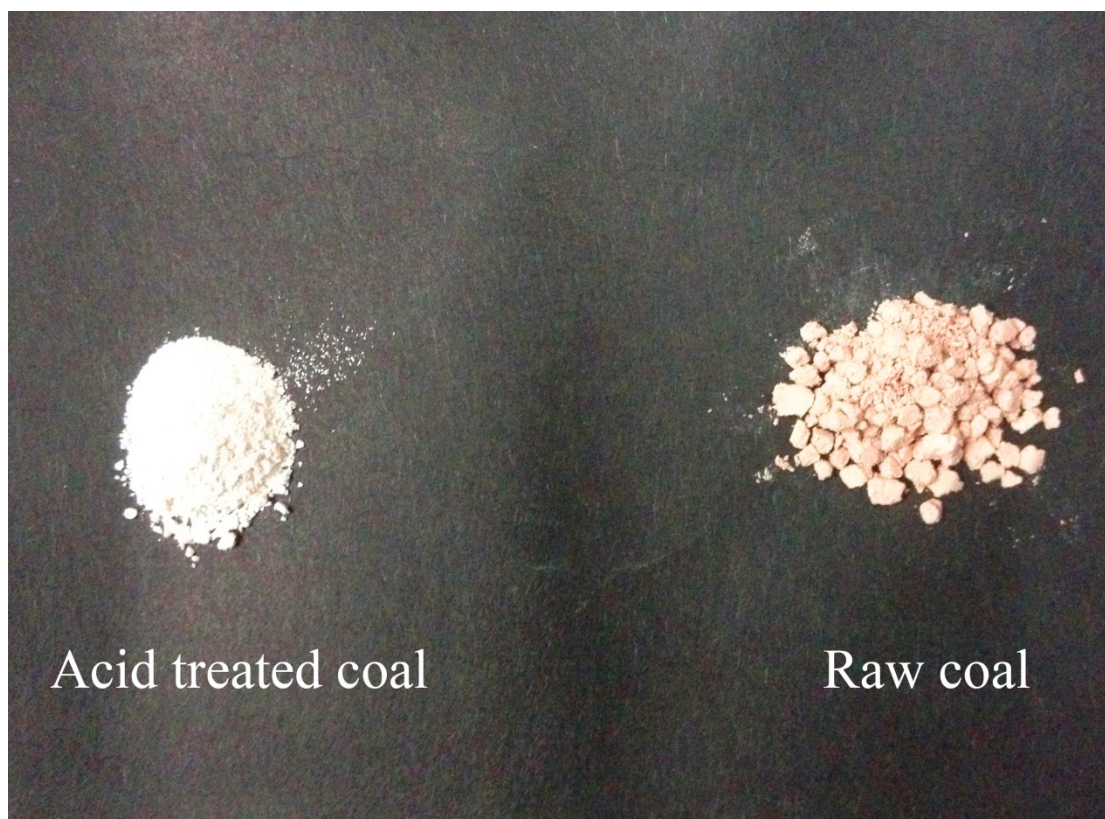

Fig S1 Optic photograph of ash of acid treated coal and raw coal

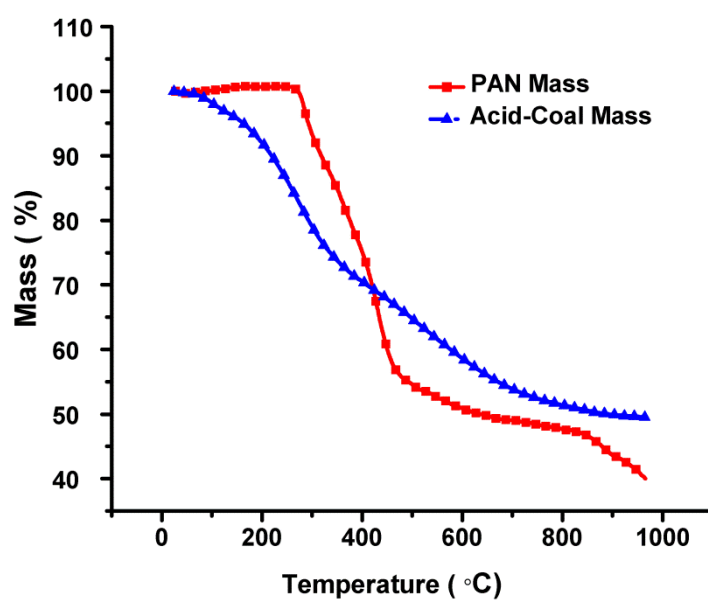

Fig S2 Thermogravimetric analyses of acid treated coal and PAN

**Table S1** Ash content coal of raw coal and acid treated coal determined according to GB212-91 in Guobiao standards for the proximate analyses of coal.

|                   | Ash percentage |
|-------------------|----------------|
| Acid Treated Coal | 6.19 wt%       |
| Raw Coal          | 7.18 wt%       |

The initial mass ratios of coal/PAN are calculated as following taking into consideration of the ash content:

We set the initial mass of PAN as 1.0 g. The mass of PAN and coal in precursor solution are listed below:

**Table S2 The mass ratio of coal/PAN in each precursor spinning dope**

|                                                 | PAN-Coal-1 | PAN-Coal-3 | PAN-Coal-5 |
|-------------------------------------------------|------------|------------|------------|
| M (coal)                                        | 0.20 g     | 0.60 g     | 1.00 g     |
| M (coal <sub>ash free</sub> ) <sup>a</sup>      | 0.19 g     | 0.56 g     | 0.94 g     |
| M (PAN)                                         | 1.00 g     | 1.00 g     | 1.00 g     |
| True mass ratios                                | 19:100     | 56:100     | 94:100     |
| a. The mass of coal eliminating the mass of ash |            |            |            |

The thermogravimetric analyses of acid treated coal and PAN showed that at 800°C (The carbonization temperature), the mass of PAN and acid treated coal remained 47.7% and 51.4%, respectively. The ash content in acid treated coal is 6.19%. Thus the carbon derived from coal can be calculated as followings: We assume that the initial mass of acid treated coal and PAN are both 100 g. The mass of carbon derived from PAN [M(c,pan)] is 47.67 g, and the mass of carbon derived from acid treated coal [M(c,coal)] plus the mass of ash [M(ash)] is 51.41 g. The proximate analysis showed the ash content of acid treated coal is 6.19 wt%. Thus the mass of carbon derived from coal is 48.41g. The mass ratio of carbon derived from coal is  $M(c,coal)/[M(c,pan)+M(c,coal)]=48.41/(48.41+47.67)=50.30\%$

The mass ratios of PAN-Coal-1, PAN-Coal-3, and PAN-Coal-5 are calculated to be 16.88%, 37.86%, and 50.30%, respectively.

**Table S3** EDS analyses of oxygen and carbon contents.

|              | CK(at%) | OK(at%) |
|--------------|---------|---------|
| PAN-C        | 93.2    | 6.8     |
| PAN-Coal-5   | 90.0    | 10.0    |
| PAN-AC       | 91.5    | 8.5     |
| PAN-Coal-AC5 | 90.9    | 9.1     |
